# Supplementary material for: Understanding the interaction mechanism of carbazole/anthracene with N , N -dimethylformamide: NMR study substantiated carbazole separation
Source: Royal Society of Chemistry journal article supplement (doi:10.1039/d2im00020b), 2022-11-16
Supplement: d2im00020b1.pdf [file d2im00020b1.pdf]

# Understanding the interaction mechanism of carbazole/anthracene with *N,N*-dimethylformamide: NMR study substantiate carbazole separation

Hui Cao,<sup>#ab</sup> Mengyu Dou,<sup>#ab</sup> Zexiang Lyu,<sup>#ab</sup>, Yingxiong Wang,<sup>ab</sup> Christian Marcus Pedersen<sup>c</sup> and Yan Qiao<sup>\*ab</sup>

<sup>a</sup> State Key Laboratory of Coal Conversion, Institute of Coal Chemistry, Chinese Academy of Sciences, 27 South Taoyuan Road, Taiyuan 030001, China

<sup>b</sup> Center of Materials Science and Optoelectronics Engineering, University of Chinese Academy of Sciences, Beijing 100049, China

<sup>c</sup> Department of Chemistry, University of Copenhagen, Universitetsparken 5, DK-2100 Copenhagen, Denmark

E-mail: qiaoy@sxicc.ac.cn

# These authors contributed equally to this work.

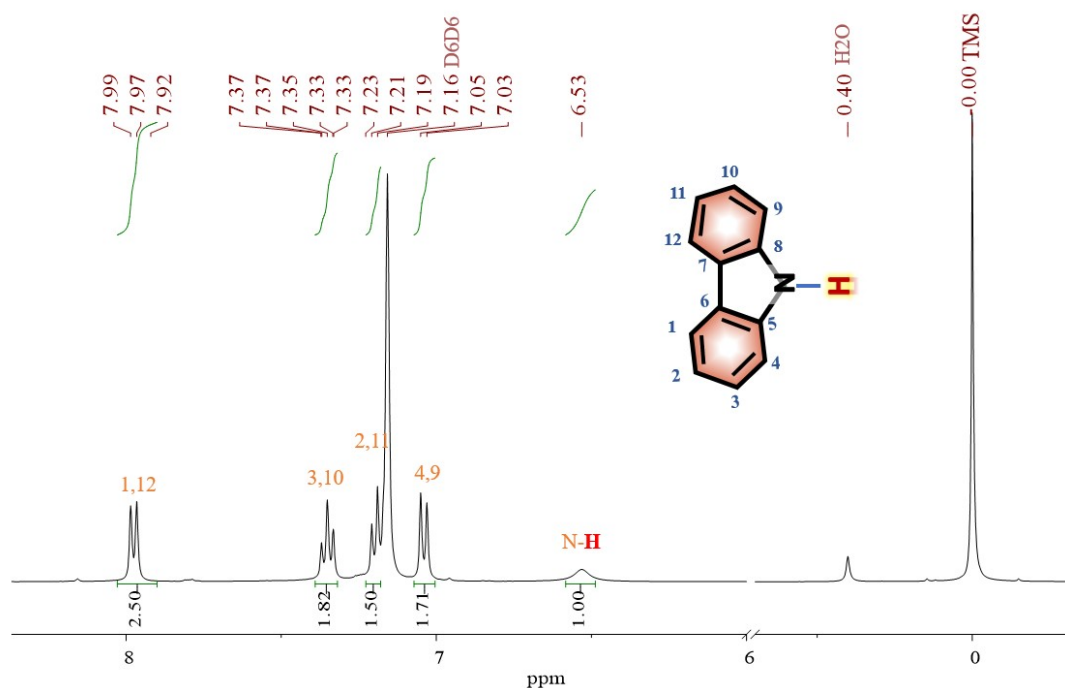

**Fig. S1.** The <sup>1</sup>H NMR spectrum of carbazole in C<sub>6</sub>D<sub>6</sub> at 25 °C. The peak area ratio of carbazole from low field to high field is about 2:2:2:2:1, which is consistent with theoretical values.

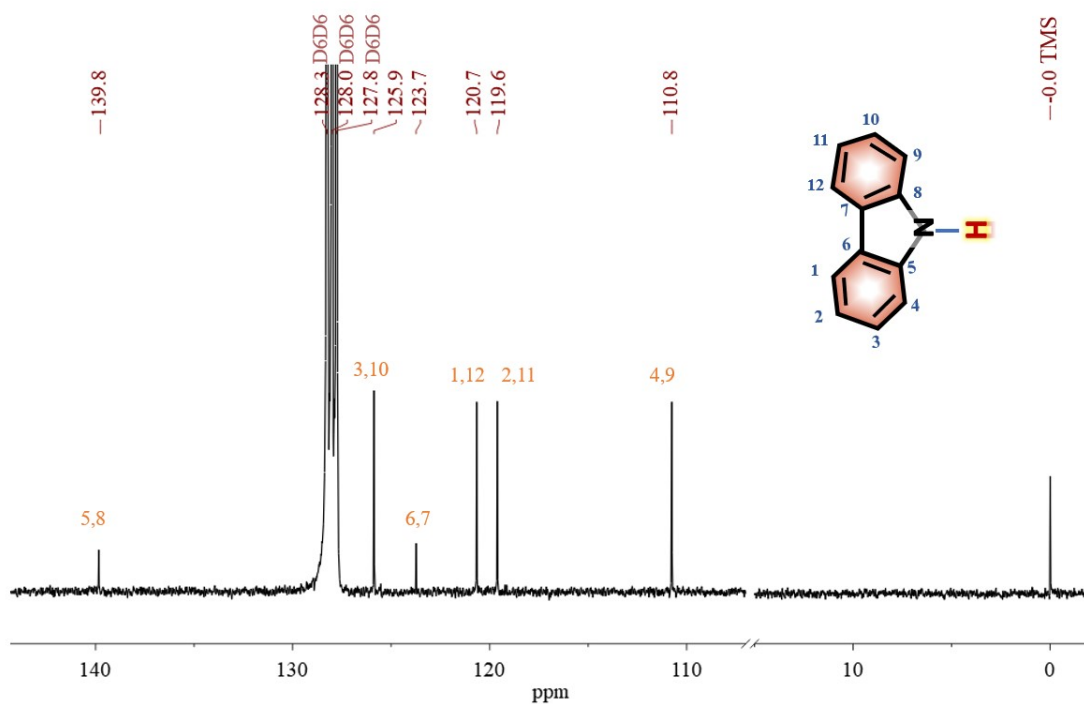

**Fig. S2.** The  $^{13}\text{C}$  NMR spectrum of carbazole in  $\text{C}_6\text{D}_6$  at  $25^\circ\text{C}$ .

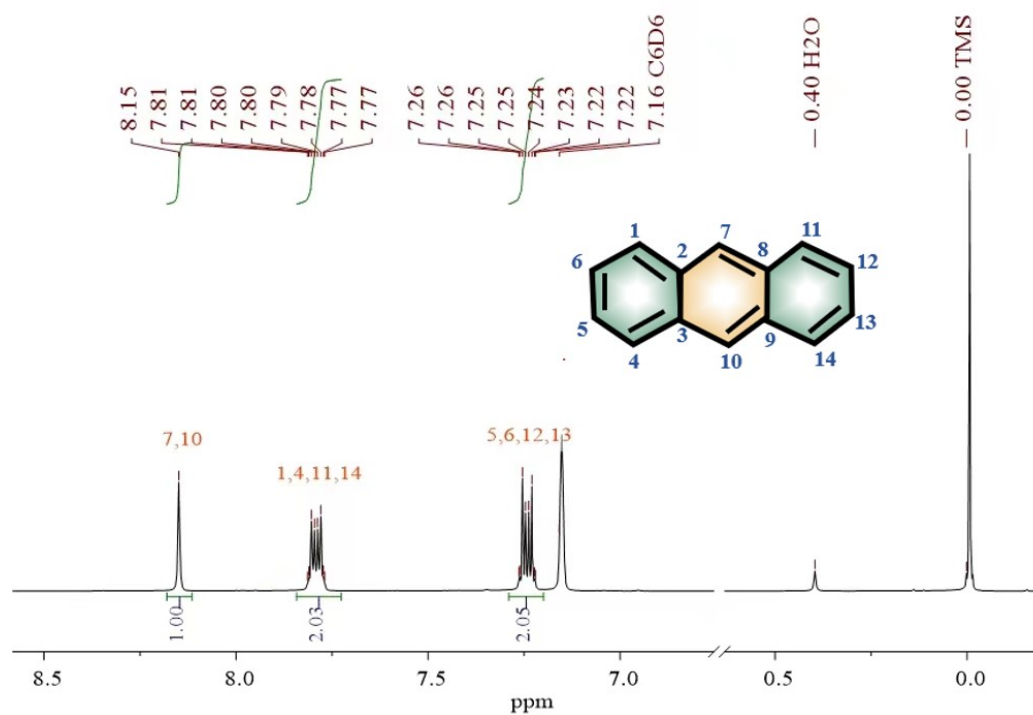

**Fig. S3.** The  $^1\text{H}$  NMR spectrum of anthracene in  $\text{C}_6\text{D}_6$  at  $25^\circ\text{C}$ . the peak area ratio of 1:2:2.

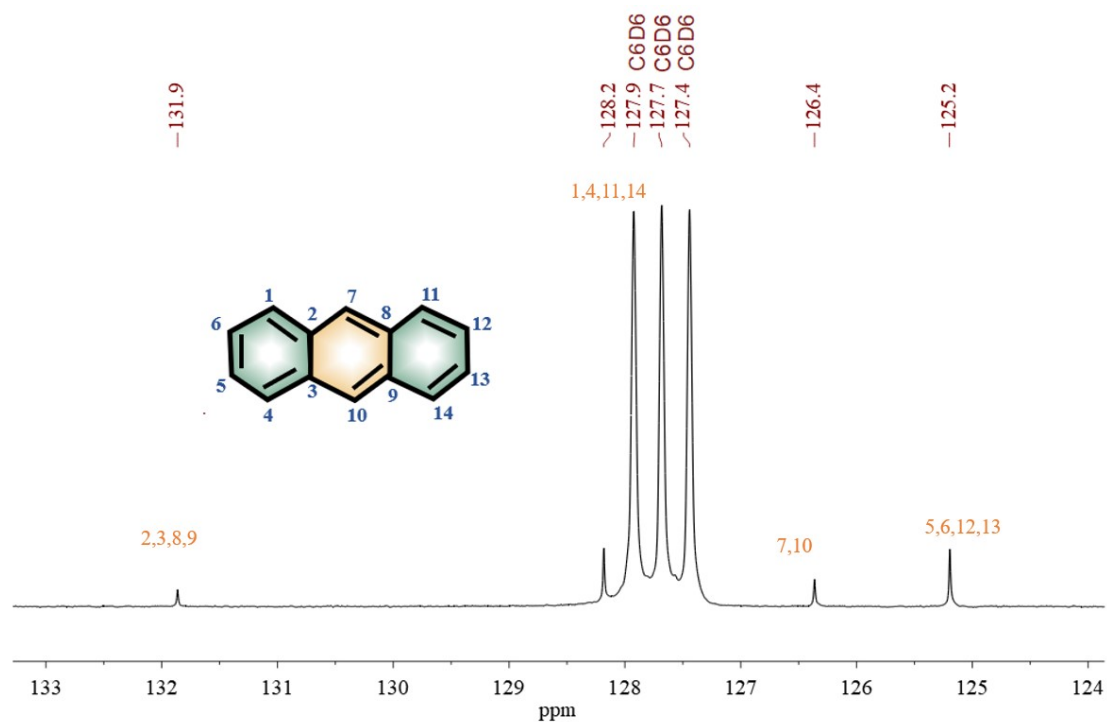

**Fig. S4.** The  $^{13}\text{C}$  NMR spectrum of anthracene in  $\text{C}_6\text{D}_6$  at  $25^\circ\text{C}$ .

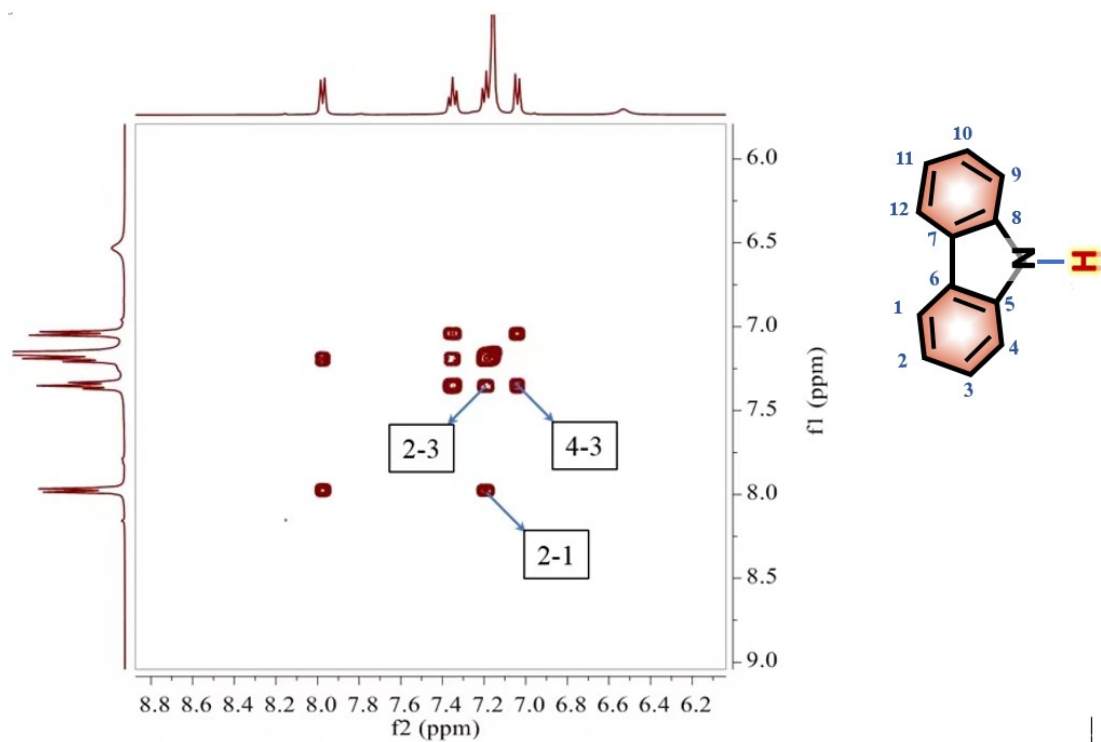

**Fig. S5.** The  $^1\text{H}$ - $^1\text{H}$  COSY spectrum of carbazole in  $\text{C}_6\text{D}_6$  at  $25^\circ\text{C}$ .

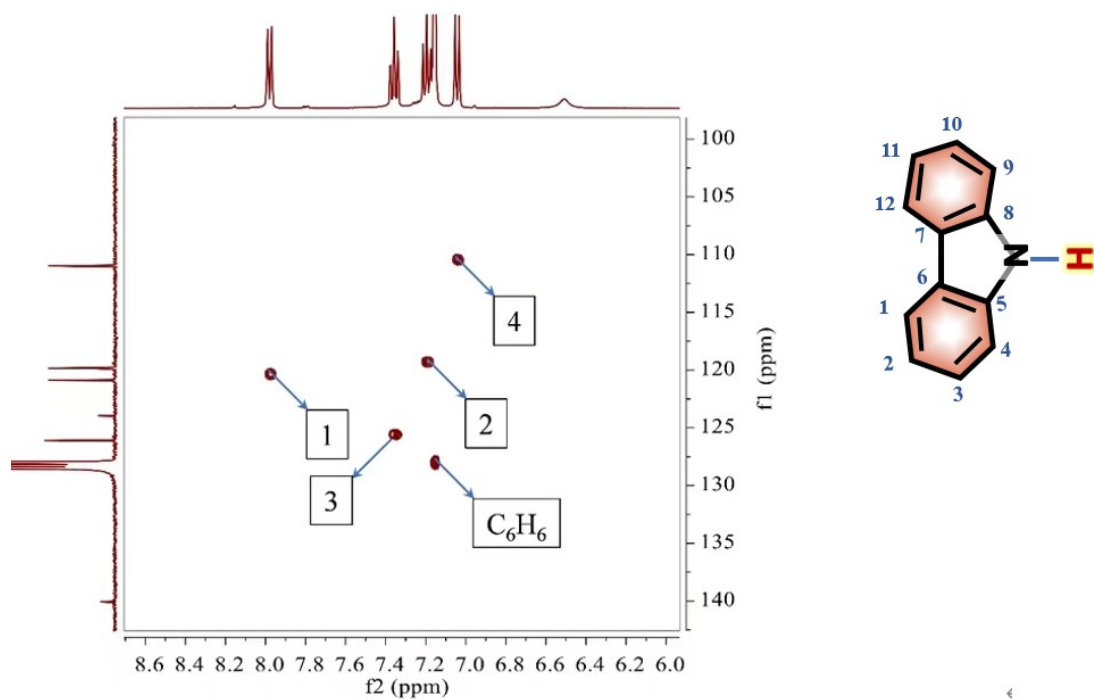

**Fig. S6.** The  $^1\text{H}$ - $^{13}\text{C}$  HSQC spectrum of carbazole in  $\text{C}_6\text{D}_6$  at 25 °C.

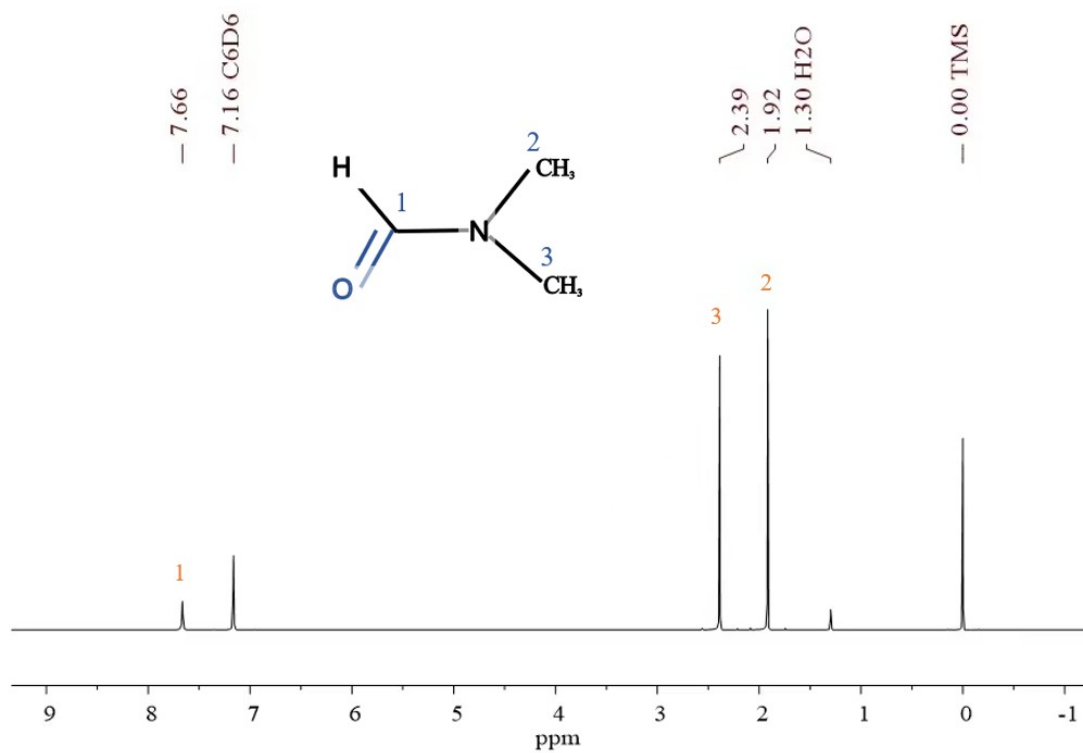

**Fig. S7.** The  $^1\text{H}$  NMR spectrum of DMF in  $\text{C}_6\text{D}_6$  at 25 °C.

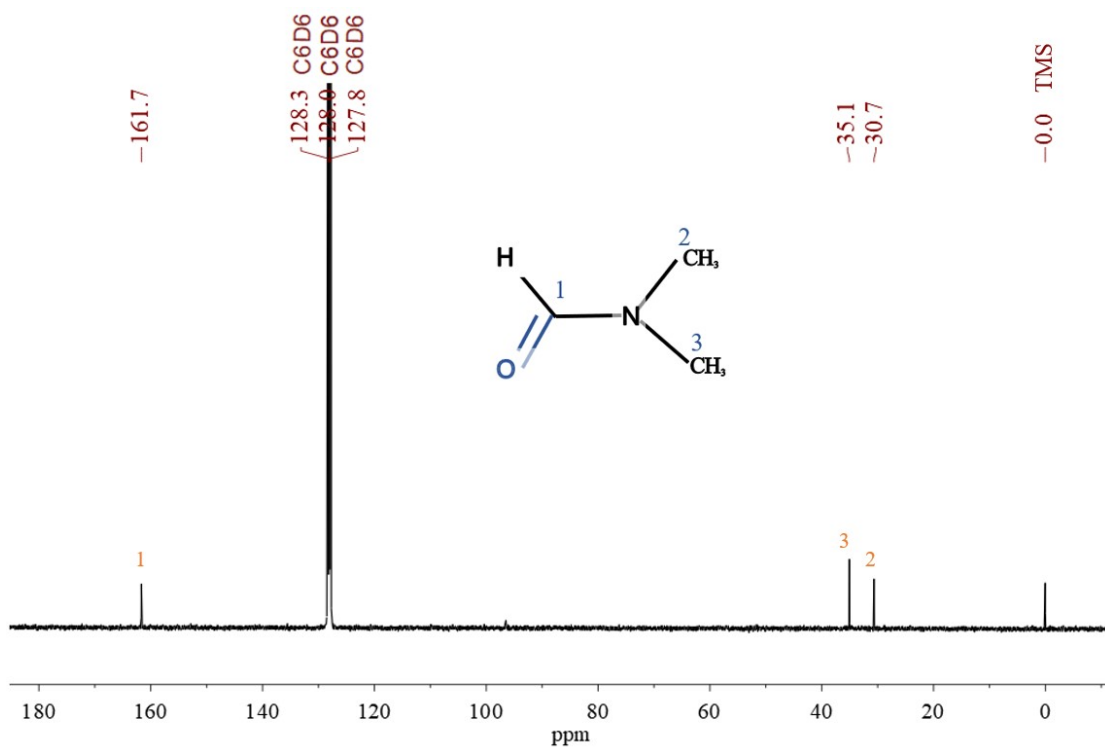

**Fig. S8.** The  $^{13}\text{C}$  NMR spectrum of DMF in  $\text{C}_6\text{D}_6$  at 25 °C.

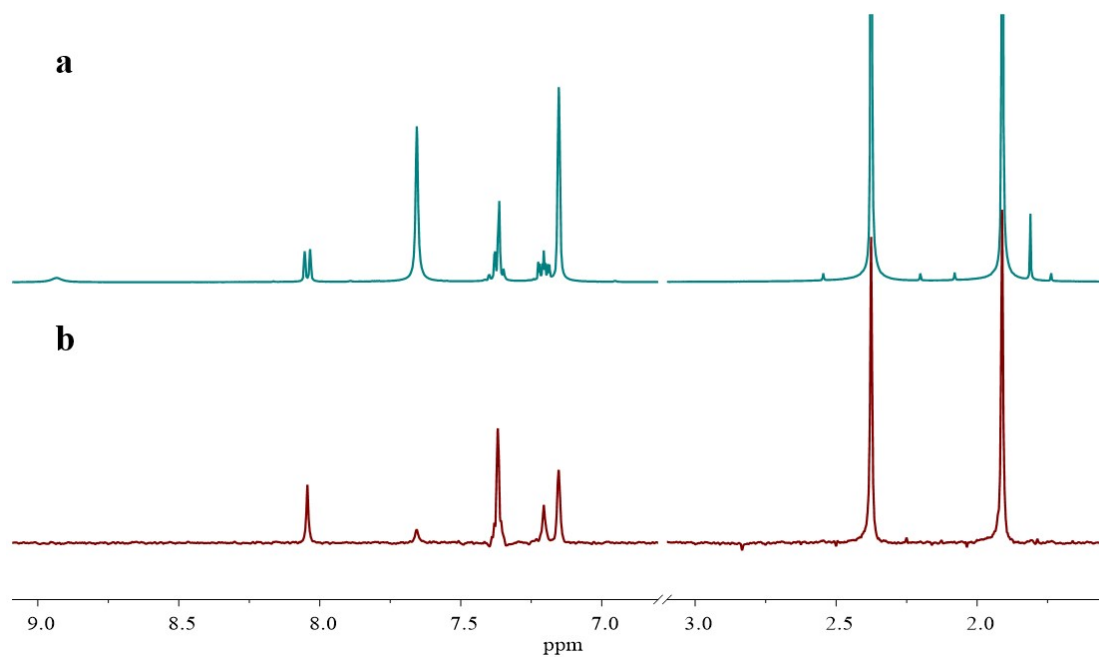

**Fig. S9.** The  $^1\text{H}$  NMR spectra of 2.0 mg carbazole and 7.1 mg DMF in deuterated benzene and at 25 °C. (a) Conventional  $^1\text{H}$  NMR spectrum, (b) Pure shift NMR spectrum.

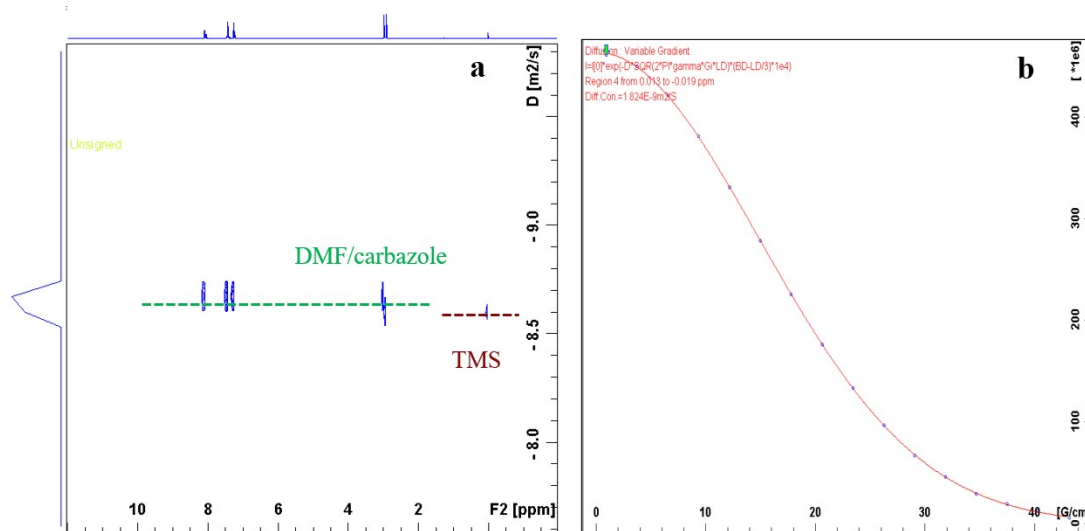

**Fig. S10.** The spectra of carbazole after adding DMF at 25 °C. (a) DOSY spectrum (b) Diffusion curve.

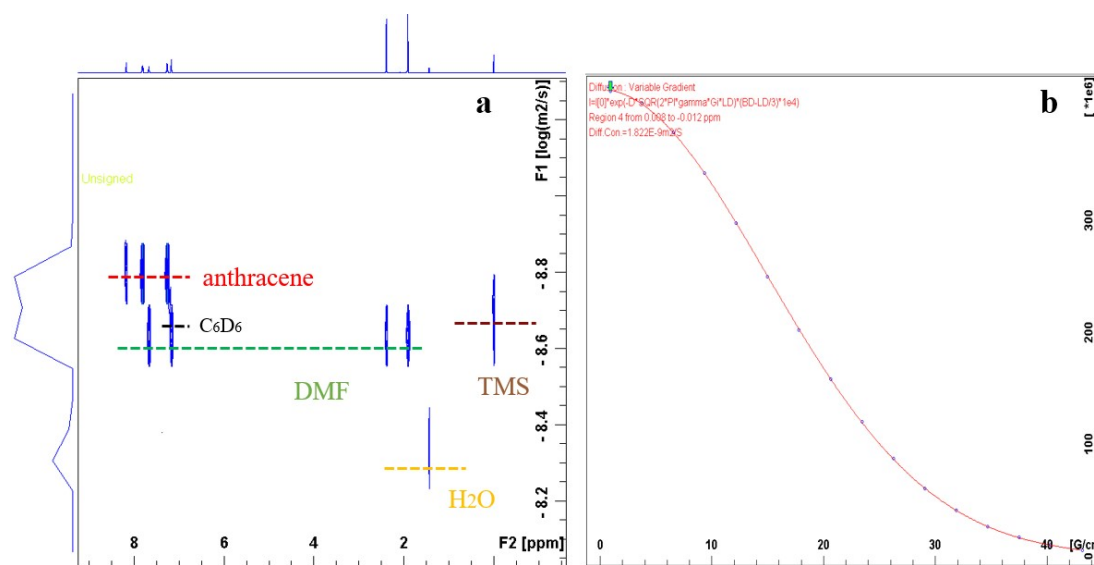

**Fig. S11.** The spectra of anthracene after adding DMF at 25 °C. (a) DOSY spectrum (b) Diffusion curve.
